# Supplementary material for: Obesity-induced overexpression of miR-802 impairs insulin transcription and secretion
Source: PubMed Central journal article supplement (PMC7156651; doi:10.1038/s41467-020-15529-w), 2020-04-14
Supplement: 41467_2020_15529_MOESM1_ESM.pdf [file 41467_2020_15529_MOESM1_ESM.pdf]

## **Supplementary Information**

Obesity-induced overexpression of *miR-802* impairs insulin transcription and secretion

Fangfang Zhang et al.

Supplementary Figure 1

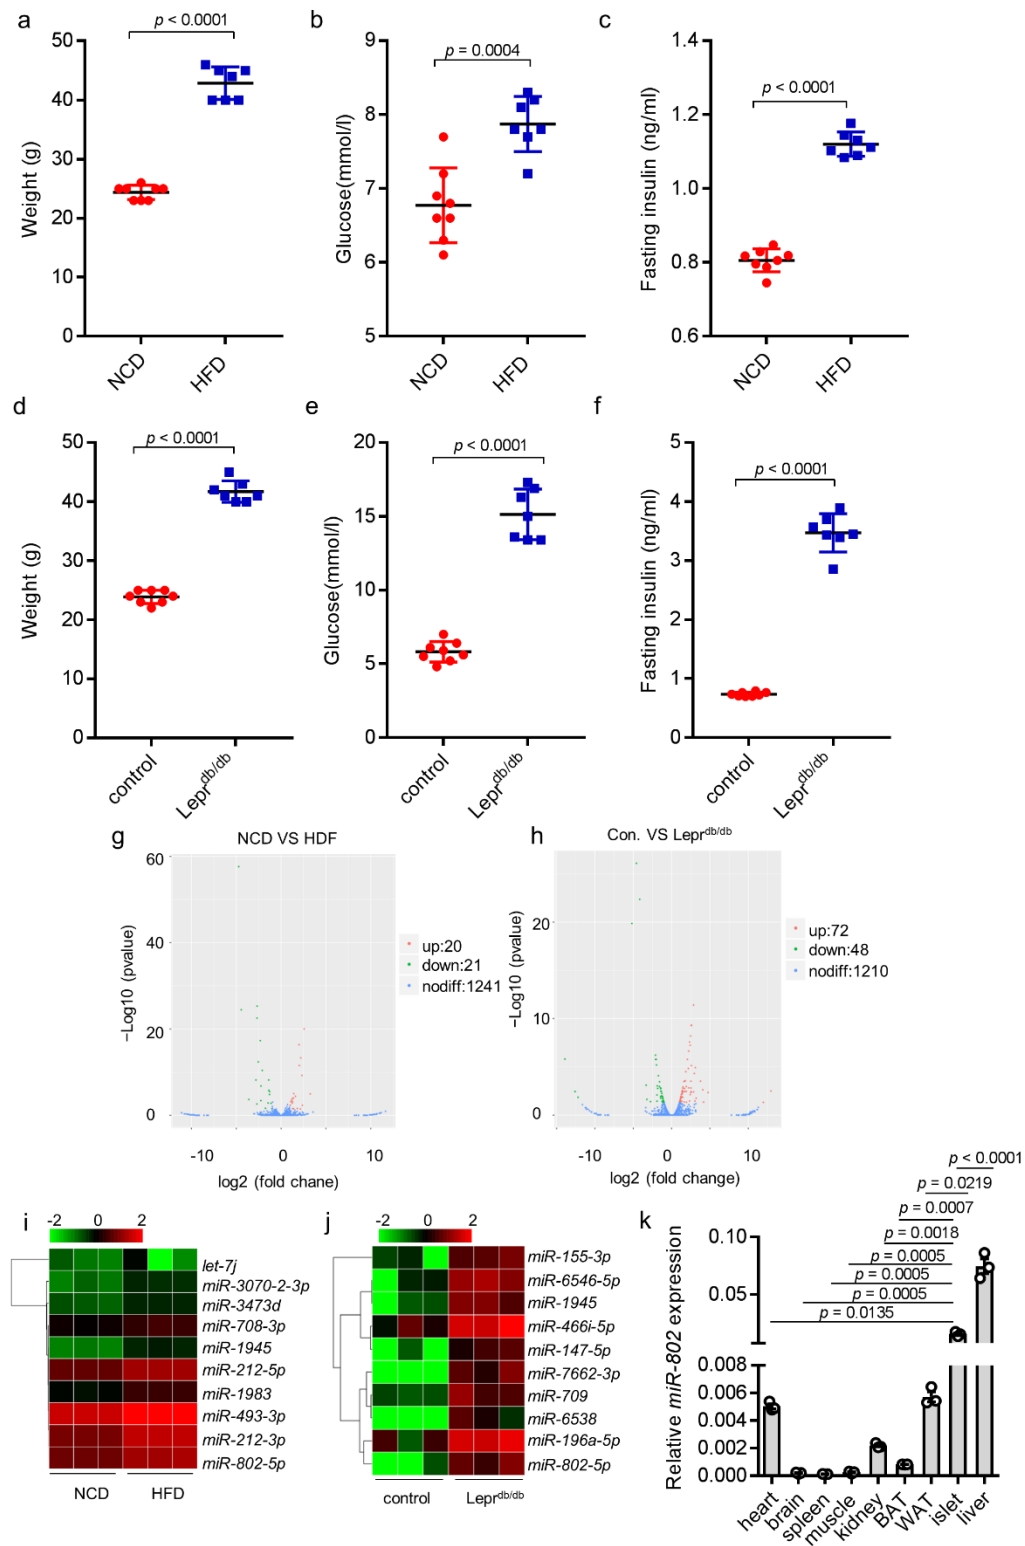

**Supplementary Figure 1** The body weight, glucose and insulin level of HFD mice compared with NCD mice (a-c,  $n = 8$  NCD group and  $n = 7$  HFD group, 14-15-week old) and *Lepr<sup>db/db</sup>* mice compared with control mice (d-f,  $n = 8$  control group and  $n = 7$  *Lepr<sup>db/db</sup>* group, 8-week old). The volcano of miRNA in HFD (g, red bar: up, green bar: down and blue bar: no difference) versus

NCD mice, and  $Lepr^{db/db}$  mice (h) versus  $Lepr^{db/-}$  mice. Heat map diagram illustrating the expression levels of top 10 up-regulated miRNAs in islets of HFD mice (i), and in  $Lepr^{db/db}$  mice (j) ( $n = 8$  NCD group and  $n = 7$  HFD group,  $n = 8$  control group and  $n = 7$   $Lepr^{db/db}$  group,). (k) The abundance of *miR-802* in different tissues of wide type mice by qRT-PCR analysis ( $n = 5$ , 8 weeks old). The  $p$ -values by two-tailed unpaired Student's  $t$  test a-f or one-way ANOVA k are indicated. All the results above were represented as mean  $\pm$  SD, except a-f (mean  $\pm$  SEM). Source data are provided as a Source Data file.

Supplementary Figure 2

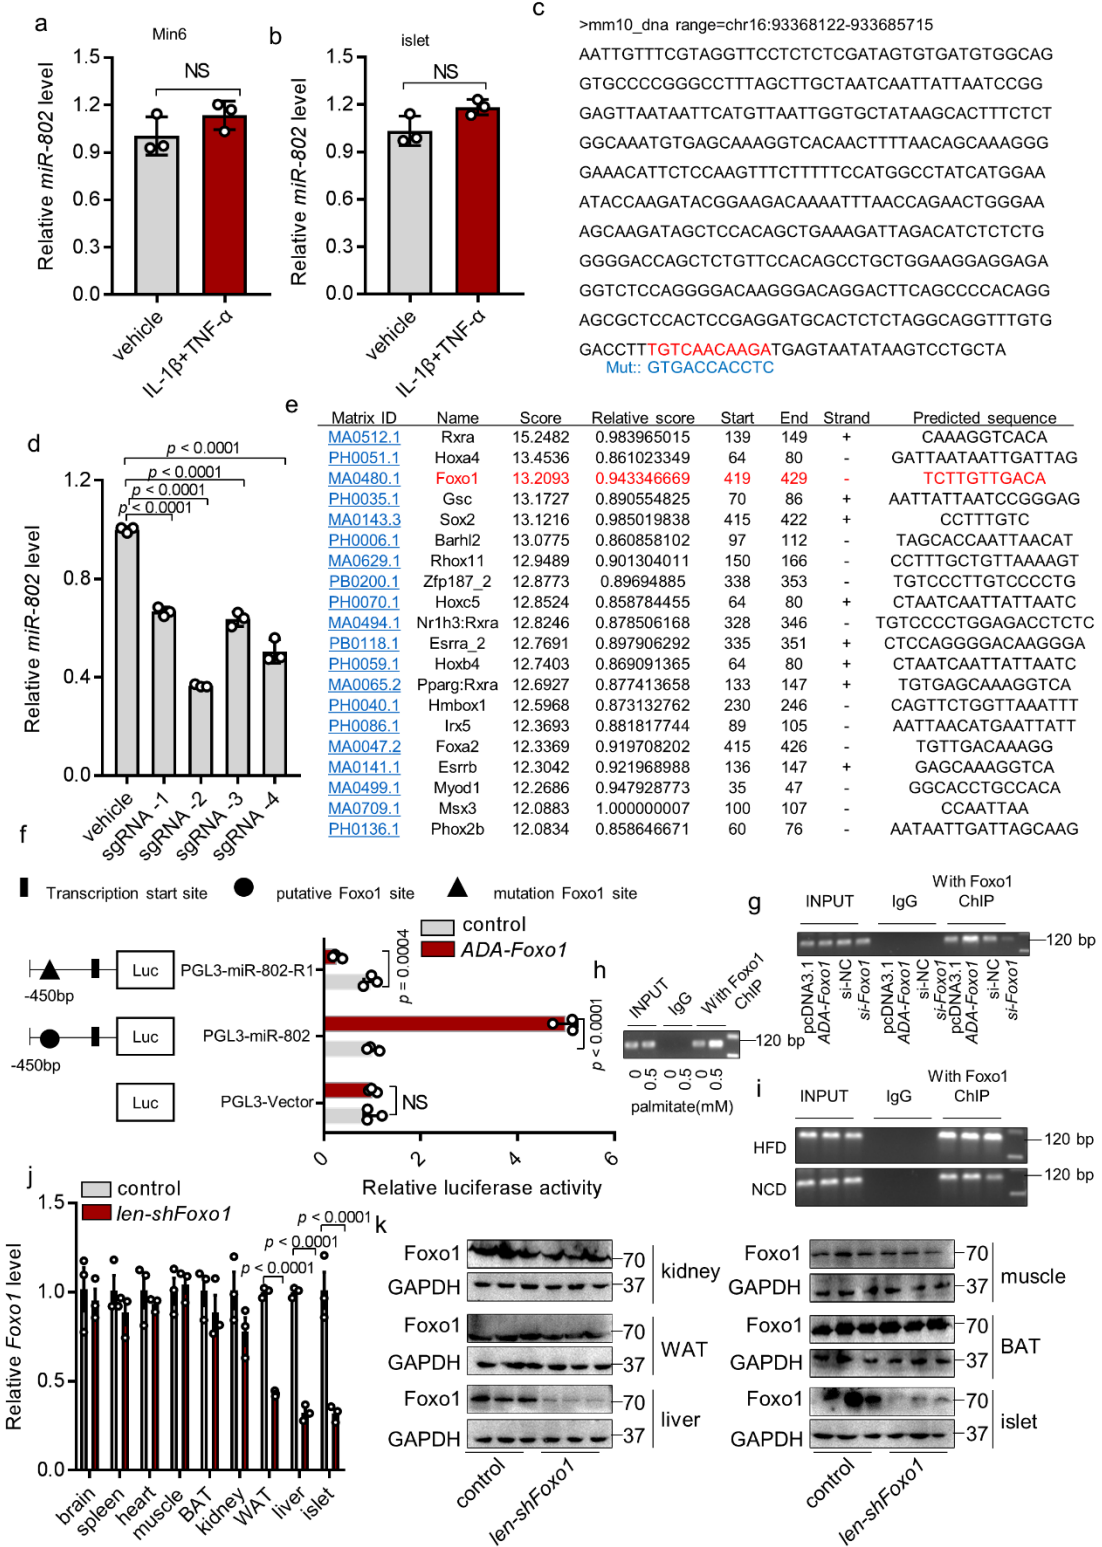

**Supplementary Figure 2** (a) Min6 cells and (b) primary islets were exposed to a combination of interleukin-1 $\beta$  (IL-1 $\beta$ , 5 ng mL $^{-1}$ ) and tumor necrosis factor- $\alpha$  (TNF- $\alpha$ , 30 ng mL $^{-1}$ , black bar and white bar: vehicle) for 48 h. (c) The sequence of *miR-802* promoter; the red marker represents the binding site of *Foxo1* and blue marker represents the mutation sequences of binding site. (d) Four sgrRNAs for predicted *miR-802* promoter region were constructed in lentiCRISPRv2 puro vector,

qRT-PCR was performed to determine the *miR-802* promoter region. (e) The high score transcription factor of *miR-802* promoter predicted by Jaspar and Promo. (f) A *Foxo1* binding site were identified in the -3 kb upstream region of the *miR-802* primary transcript. Mutagenesis in the putative binding site abrogated the induction activity of *Foxo1* in the Min6 cells. ChIP experiment showed that *Foxo1* binds to *miR-802* promoter via RT-PCR analysis, in the Min6 cells (g), in 0.5 mM palmitate-treated Min6 cells (h), and in obese mice islets (i,  $n = 5$ ). (j-k) The Knockdown efficiency of Foxo1 were analyzed by qRT-PCR (j) and western blot (k,  $n = 5$ ). All experiments above were performed in triplicates, where each group consisted of three samples. The  $p$ -values by two-tailed unpaired Student's t test a, b, one-way ANOVA d or two-way ANOVA f and j are indicated. NS, Not Significant. Data represent the mean  $\pm$  SD. Source data are provided as a Source Data file.

Supplementary Figure 3

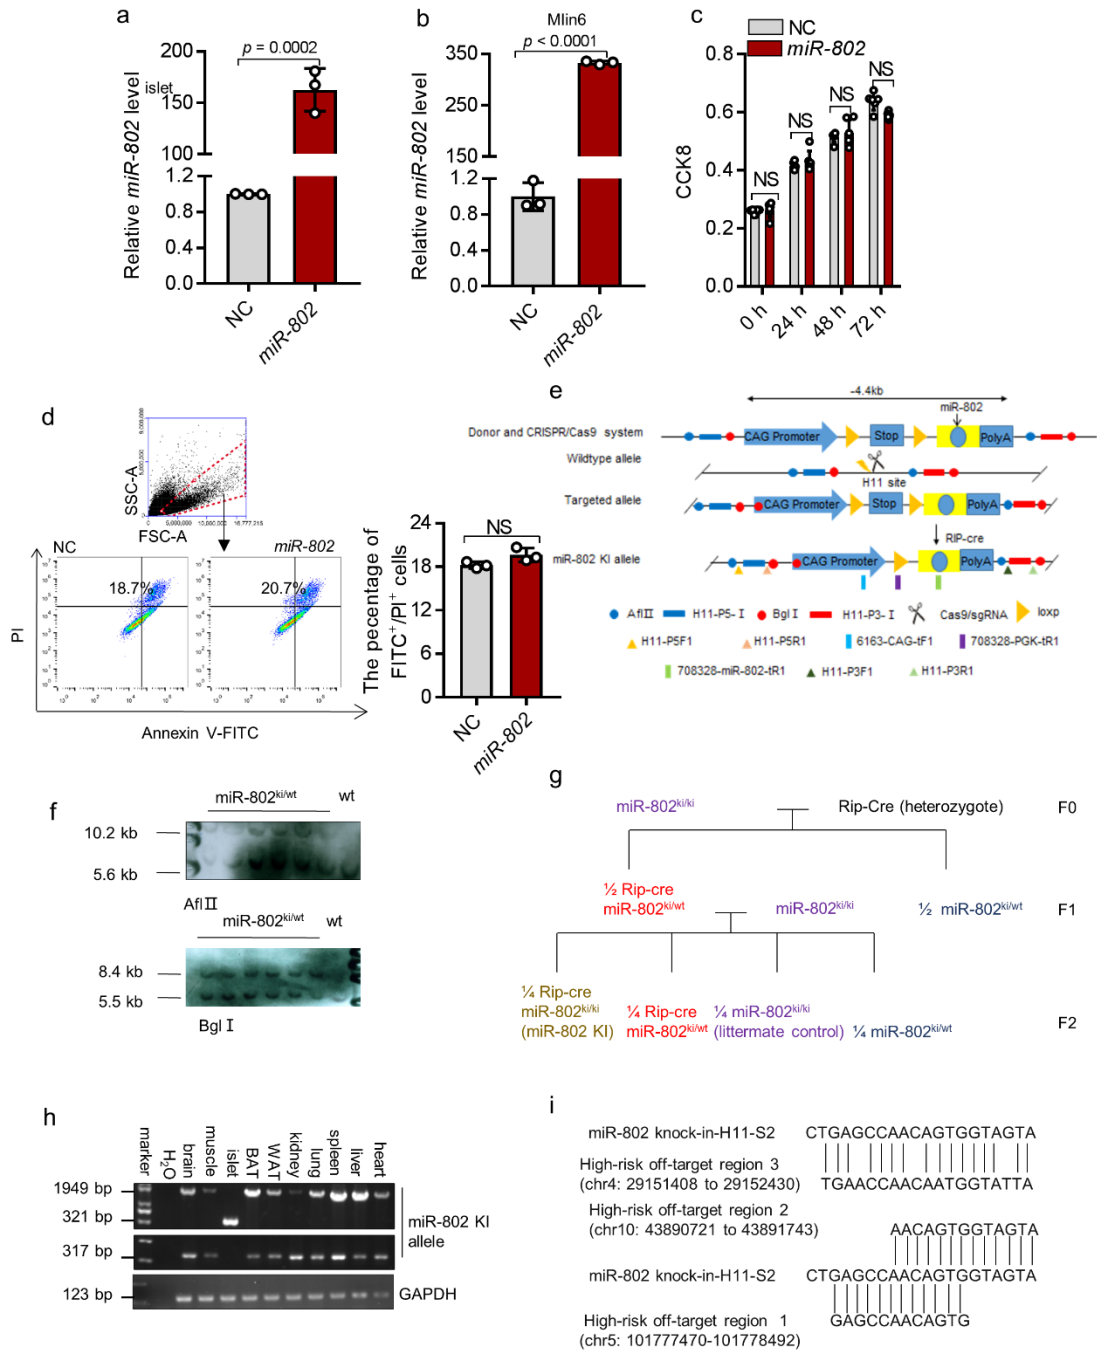

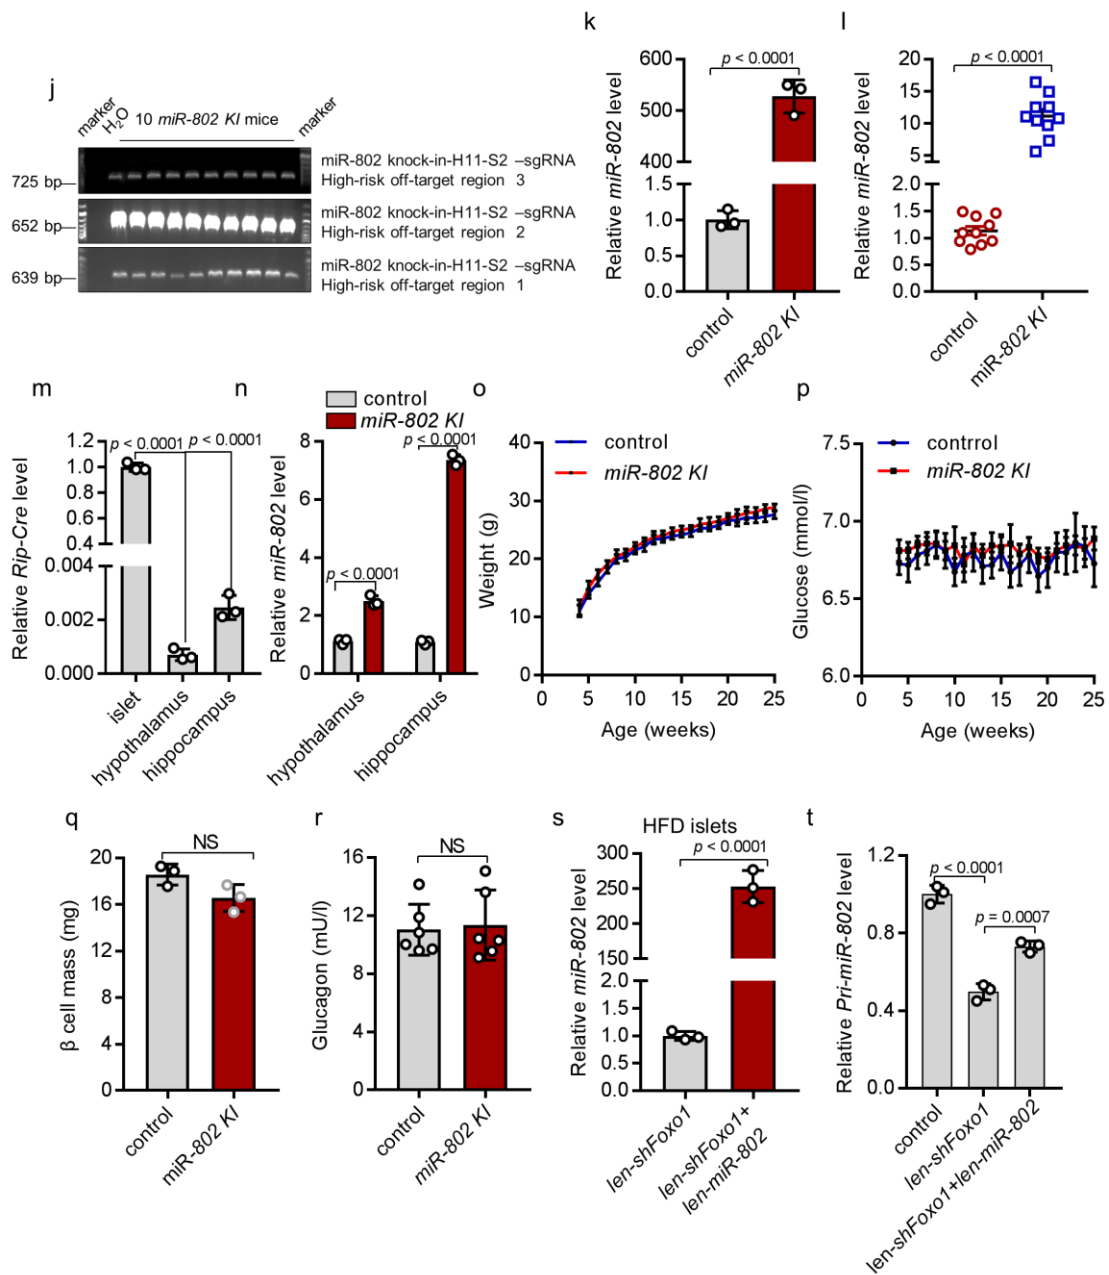

**Supplementary Figure 3** The transfection efficiencies of *miR-802* (a) in islets ( $n = 3$ , 8 weeks old) and (b) in Min6 cells ( $n = 3$  cells). (c) CCK-8 assay was performed at 24, 48, and 72 h ( $n = 6$  cells), and flow cytometry was conducted 48 h after transfection, the numbers represent the percentage of FITC<sup>+</sup> cells and PI<sup>+</sup> cells. (d). (e) Strategy used to generate *miR-802* knock-in mice. Primers (H11-P5F1, H11-P5R1, H11-P3F1 and H11-P3R1) were used for southern blotting analyze. Primers (6163-CAG-tF1, 708328-PGK-tR1, 708328-miR802-tR1) were used for selective overexpression of the *miR-802* gene. (f) Southern blotting of tail genomic DNA ( $n = 6$ ). Wild type allele: 5.6 kb for AflIII and 5.5 kb for BglII; heterozygote targeted allele: 10.2 kb for AflIII and 8.4 kb for BglII. (g) The cross flowchart to obtain *miR-802* KI mice according to Mendelian inheritance. (h) Selective overexpression of the *miR-802* gene in islets ( $n = 5$ ). Wild type allele revealed two bands, 317 bp and 1921 bp; mutant allele revealed only one band, 321 bp. (i) The high-risk off-target sequence of *miR-802* knock-in-H11-S2-sgRNA by [<http://crispr.tefor.net/>], (j) the off target effects ( $n = 10$ ). (k)

*miR-802* levels in primary islets ( $n = 5$ ), in the serum (l,  $n = 10$ ). (m) Rip-Cre expression in islet, hypothalamus and hippocampus from Rip-Cre mice ( $n = 5$ ). *miR-802* expression in hypothalamus and hippocampus (n,  $n = 5$ ), Body weight (o) and Adlibitum-fed blood glucose levels (p,  $n = 11$  control group,  $n = 9$  *miR-802 KI* group). (q)  $\beta$  cell mass ( $n = 3$ ), (r) The glucagon levels ( $n = 6$ ). (s) Overexpression efficiency of *miR-802* and *Pri-miR-802* levels (t,  $n = 5$ , 17-18 weeks old). All experiments above were performed in triplicates, where each group consisted of three samples. The  $p$ -values by two-tailed unpaired Student's  $t$  test a, b, d, k, l, q, r and s, one-way ANOVA m, and t, or two-way ANOVA c, m and n are indicated. All the results above were represented as mean  $\pm$  SD except o-p (mean  $\pm$  SEM). Source data are provided as a Source Data file.





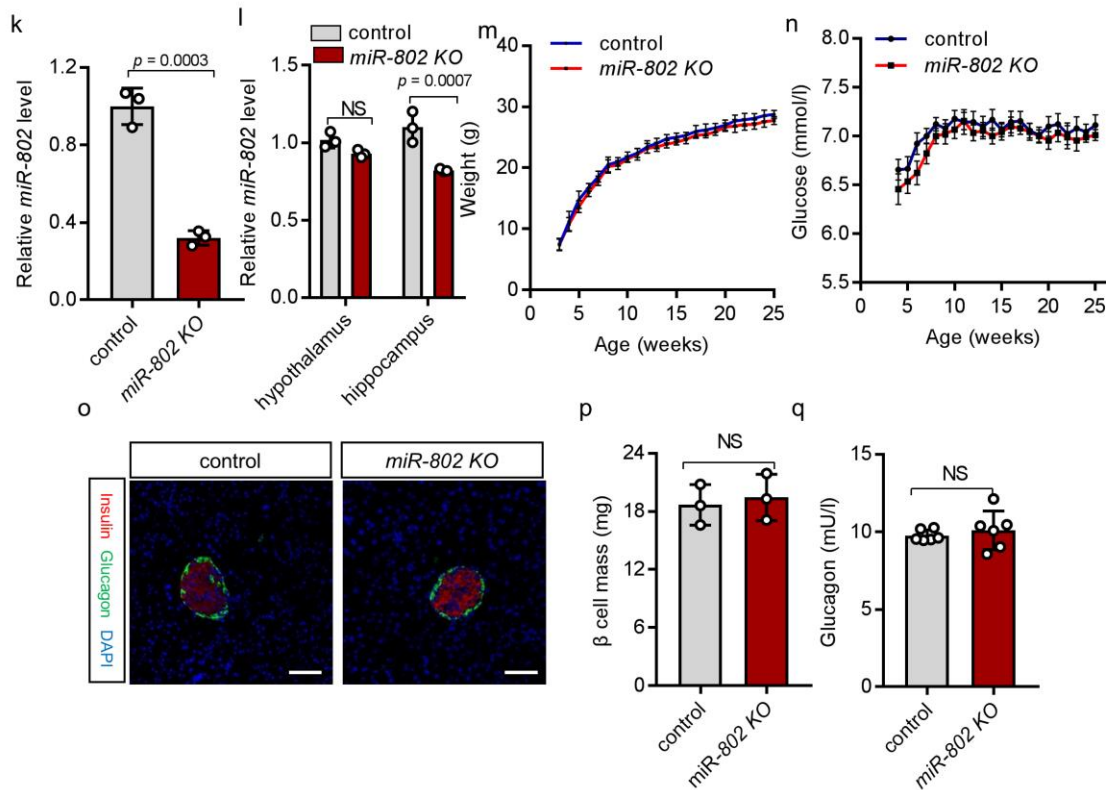

**Supplementary Figure 4** The knockdown efficiencies of *miR-802* (a) in islets ( $n = 3$ , 8 weeks old) and (b) in Min6 cells. (c) CCK-8 assay was performed at 24, 48, and 72 h, and flow cytometry was conducted 48 h after transfection, the numbers represent the percentage of FITC<sup>+</sup> cells and PI<sup>+</sup> cells (d). (e) Strategy used to generate *miR-802* mutant mice. The primer of 100276-*miR-802*-wt-tF1 and 100276-*miR-802*-wt-tR1 were used to RT-PCR analyze. The primer of Zmk-2F4, and 100276-*miR-802*-F0-3tR1 were used to selective deletion of the *miR-802* gene in islets of *miR-802* KO mice. (f) RT-PCR of tail genomic DNA isolated from wild type (wt) and heterozygote (*miR-802*<sup>fl/wt</sup>,  $n = 4$ ). *miR-802* mutant mice crossed with Deleter cre mice. Wild type allele revealed one bands, 121 bp; heterozygote allele revealed two band, 214 bp and 121 bp. (g) The cross flowchart to obtain *miR-802* KO mice according to Mendelian inheritance. (h) Selective deletion of the *miR-802* gene in islets of *miR-802* KO mice ( $n = 5$ ). Genomic DNA from indicated mouse tissues was used in PCR with *miR-802* primers spanning LoxP sites (Top) and GAPDH as control (Bottom), white adipose tissue (WAT), and brown adipose tissue (BAT). (i) The high-risk off-target sequence of *miR-802* knockout-5S4-sgRNA and *miR-802* knockout-3S6-sgRNA via [<http://crispr.tefor.net/>], (j) the off target effects of *miR-802* KO mice ( $n = 10$ ). (k) Relative *miR-802* expression in islets of *miR-802* KO and control mice ( $n = 5$ , 8 weeks old). (l) Relative *miR-802* expression level in hypothalamus and hippocampus of *miR-802* KO mice ( $n = 5$ ). (m) Body weight and Adlibitum-fed blood glucose levels ( $n, n = 9$ ). (o) Islet organization ( $n = 3$ , 10 weeks old). Scale bar: 50  $\mu$ m. (p) Pancreatic  $\beta$  cell mass ( $n = 3$ , 25-week old). (q) Glucagon levels ( $n = 6$ ). All experiments above were performed in triplicates, where each group consisted of three samples. The  $p$ -values by two-tailed unpaired Student's t test a, b, d, k, p, and q, or two-way ANOVA c and l are indicated. Data represent the mean  $\pm$  SEM. Source data are provided as a Source Data file.

Supplementary Figure 5

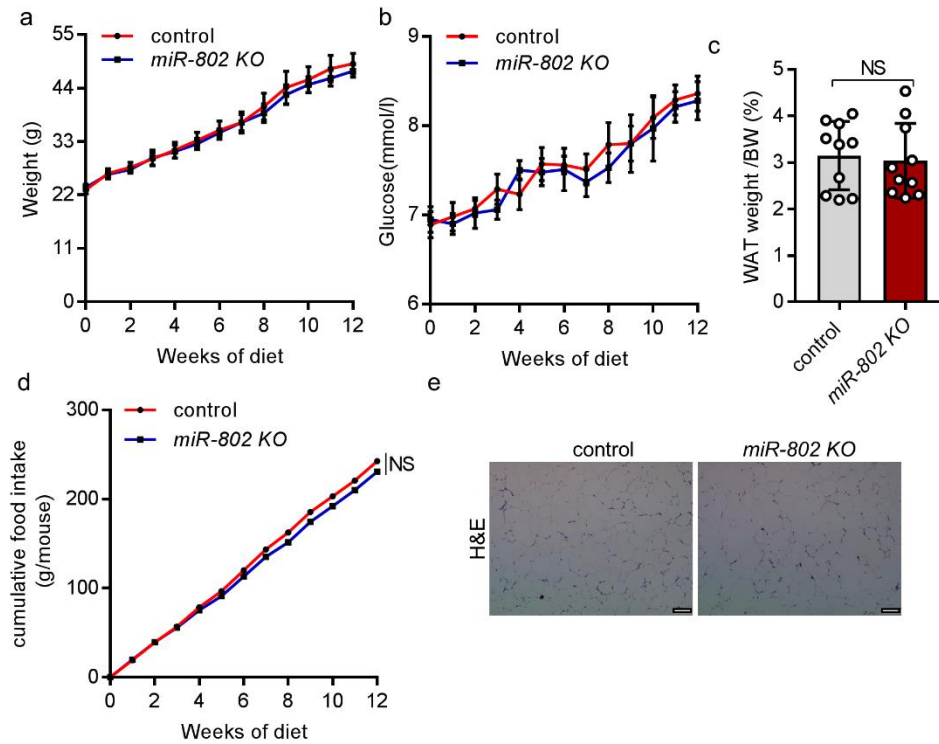

**Supplementary Figure 5** (a) Changes in the body weight of *miR-802* KO and control mice treated with a HFD for 12 weeks ( $n = 10$  per time point), Fasting blood glucose levels (FBG) (b,  $n = 10$ ), cumulative energy intake (c,  $n = 10$ ), white adipose tissue weight per body weight ratio (d,  $n = 10$ ) and representative H&E staining of white adipose tissue in *miR-802* KO mice and control mice treated with HFD (e, Magnification:  $4 \times$ , Scale bar:  $100 \mu\text{m}$ ,  $n = 5$ ). FBG levels and cumulative energy intake were measured every 1 week. The  $p$ -values by two-tailed unpaired Student's  $t$  test c, or two-way ANOVA d are indicated. Data represent the mean  $\pm$  SEM. Source data are provided as a Source Data file.

Supplementary Figure 6

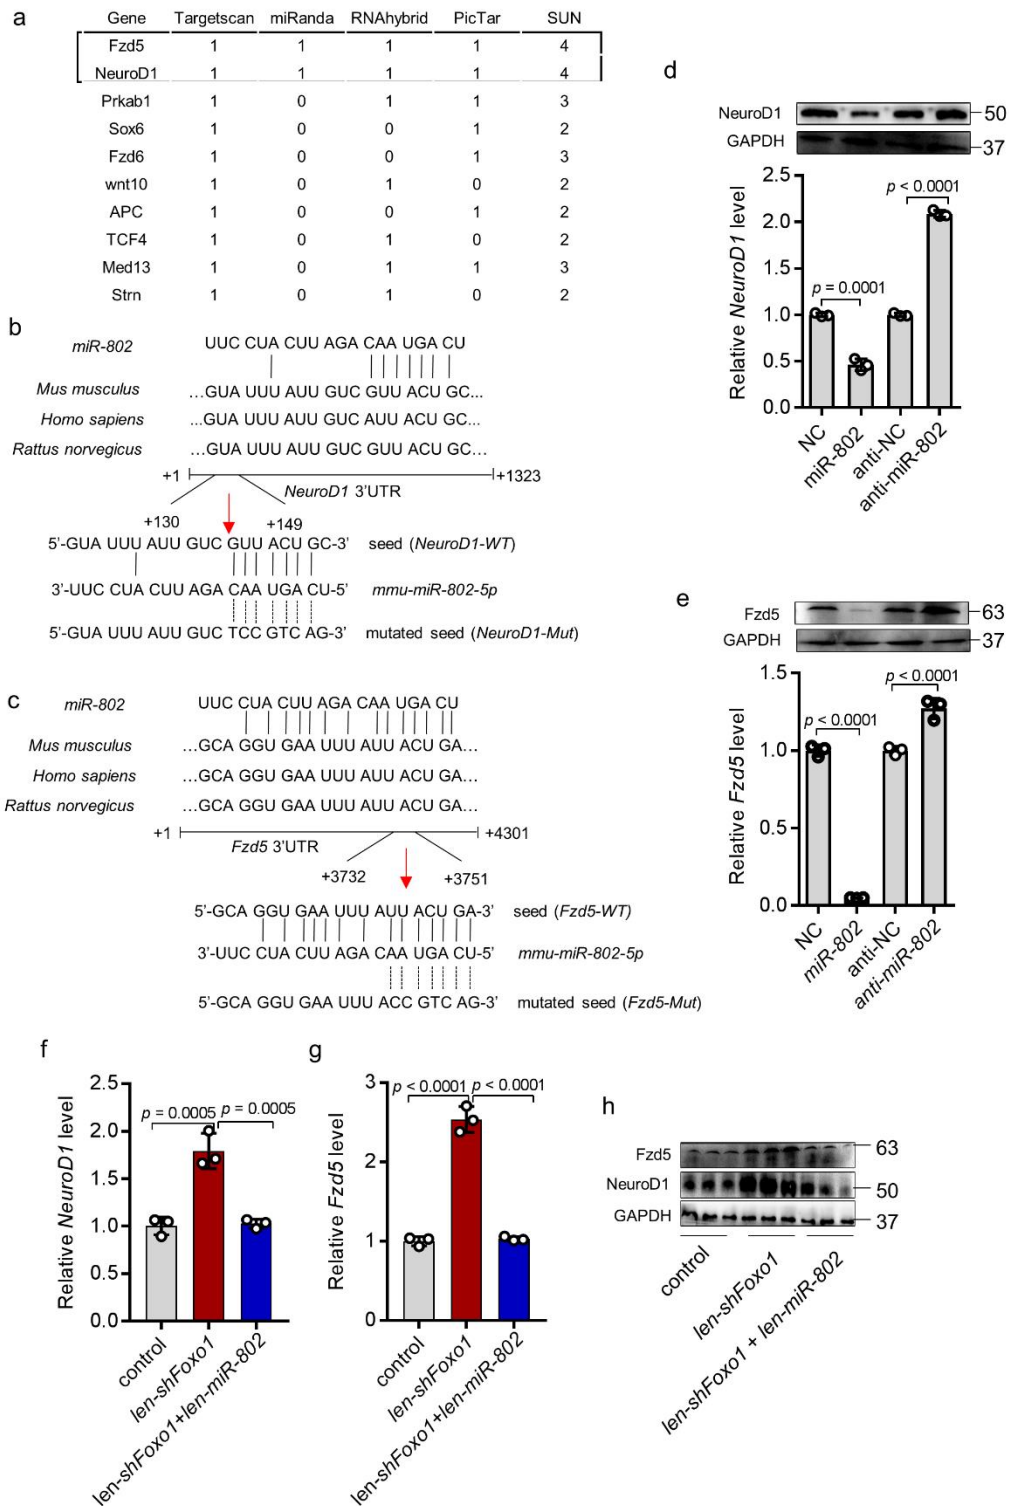

**Supplementary Figure 6** (a) List of ten putative *miR-802* target genes with a seed sequence homology of > 6 nucleotides and simultaneously predicted by four independent miRNA target prediction algorithms. (b-c) Graphic representation of the conserved *miR-802* binding motif in the *NeuroD1* and *Fzd5* 3'UTR of three mammalian species. The consensus mature *miR-802* sequence was depicted on top. And schematic description of the wildtype (top)

and mutated (bottom) *miR-802* seed binding motif located in the murine *NeuroD1*- and *Fzd5*-3'UTR used for transient reporter gene transfection experiments. The mRNA and protein levels of *NeuroD1* (d) and *Fzd5* (e) in Min6 cells. The mRNA (f-g) and protein (h) levels of *NeuroD1* and *Fzd5* in the islet of HFD-fed mice injected with *lentivirus-shFoxo1* and *lentivirus-miR-802* ( $n = 5$ , 17-18 weeks old). All experiments above were performed in triplicates, where each group consisted of three samples. The  $p$ -values by one-way ANOVA d, e, f and g are indicated. Data represent the mean  $\pm$  SD. Source data are provided as a Source Data file.

Supplementary Figure 7

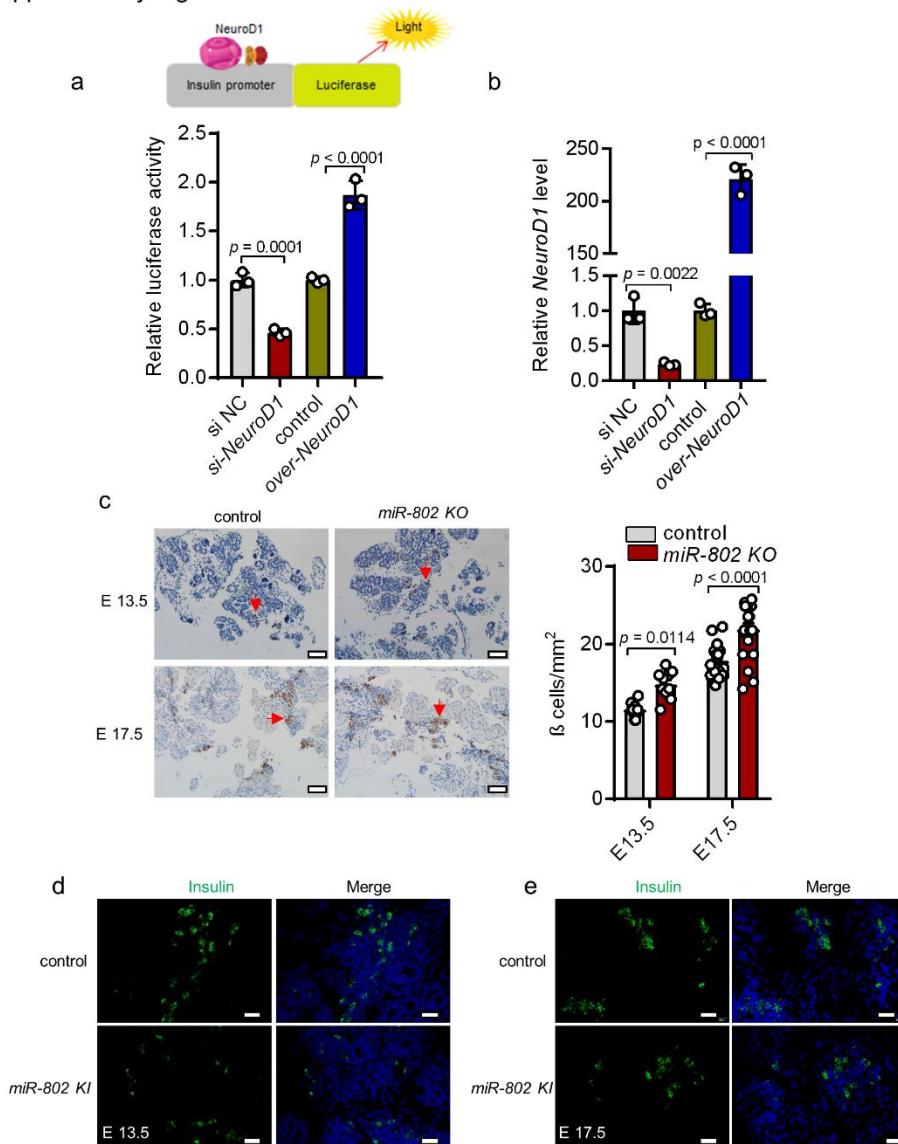

**Supplementary Figure 7** (a) *NeuroD1* bound to insulin promoter as determined by dual luciferase assay. (b) Overexpression and knockdown *NeuroD1* in Min6 cells for 48 h; qRT-PCR was performed to evaluate the transfection efficiency. All experiments above were performed in triplicates, where each group consisted of three groups. All the results above were represented as mean  $\pm$  SD,  $**p < 0.01$ ,  $***p < 0.001$  compared with the siNC or control. (c) Pancreatic sections of control mice and

*miR-802 KO* mice were immunohistochemically stained for insulin at E13.5 (upper) and E17.5 (lower). Scale bars: 50  $\mu\text{m}$  ( $n = 3$  mice 6–8 slides animal<sup>-1</sup>). The number refers to insulin cell numbers/pancreas area. (d-e) Immunofluorescence of insulin (green) and DAPI (blue) in E13.5 (d) and E17.5 (e) pancreas of control mice and *miR-802 KI* mice ( $n = 3$  mice). Data information: The  $p$ -values by two-tailed unpaired Student's  $t$  test b, one-way ANOVA a, or two-way ANOVA c are indicated. Data are presented as means  $\pm$  SD. Source data are provided as a Source Data file. Scale bars: 50  $\mu\text{m}$  (c); 20  $\mu\text{m}$  (d, e).

Supplementary Figure 8

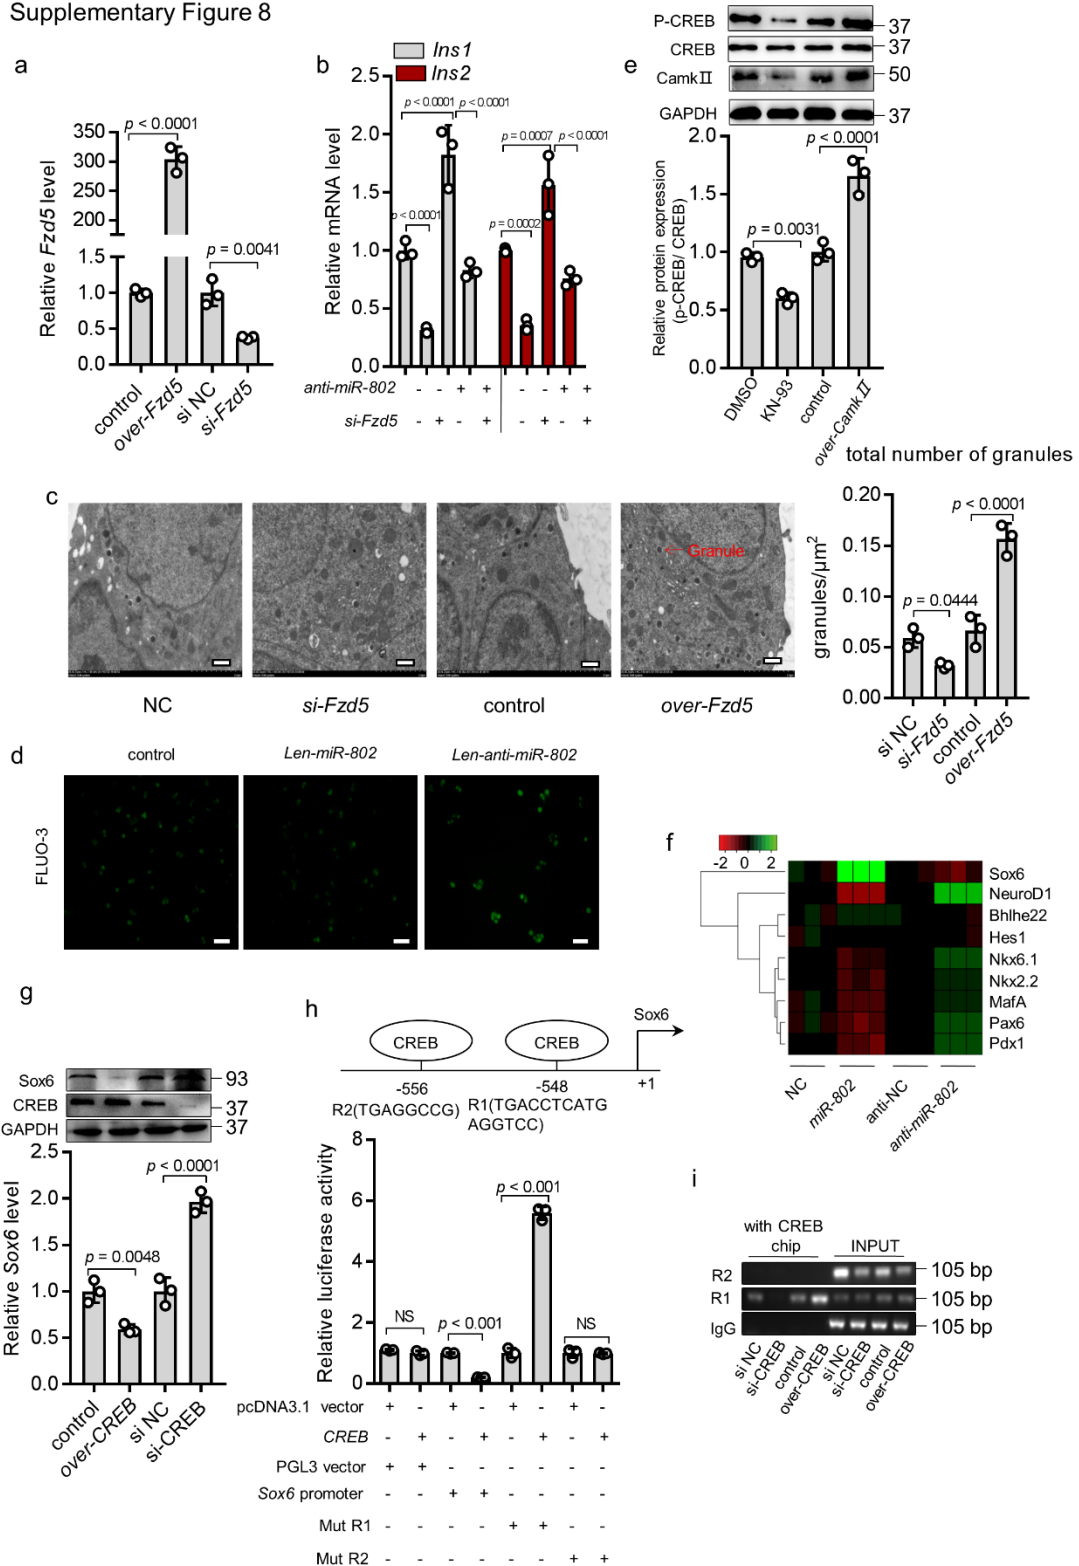

**Supplementary Figure 8** (a) The transfection efficiency of *Fzd5* was analyzed by qRT-PCR when *over-Fzd5* vector or *si-Fzd5* were transfected in Min6 cells for 48 h. (b) Min6 cells were co-transfected with si NC or *si-Fzd5* and anti-NC or *anti-miR-802*. After 48 h, *Ins1* and *Ins2* expression levels were evaluated by qRT-PCR. (c) Overexpression and knockdown of *Fzd5* in Min6 cells; granules were quantified by electron microscopy. Scale bars: 20  $\mu\text{m}$ . (d) Overexpression and

knockdown of *miR-802* in Min6 cells for 48 h; intracellular  $\text{Ca}^{2+}$  content was measured by FLUO-3. Scale bars: 50  $\mu\text{m}$ . (e) Western blot was performed to analyze the phosphorylation level of CREB when *CamkII* was overexpressed or suppressed. (f) Transfected *miR-802* mimics and *anti-miR-802* in Min6 cells; qRT-PCR was conducted to evaluate the islet transcription factors. (g) *si-CREB* or *CREB* was transfected into Min6 cells. qRT-PCR and western blot were conducted to examine the expression level of *Sox6*. (h) Two *CREB* binding sites were identified in the -2 kb upstream region of the *Sox6* promoter (top), mutagenesis in the putative binding site of *CREB* enhanced the induction of *Sox6* in the Min6 cells (bottom). (i) ChIP experiment showed that *CREB* binds to the promoter of *Sox6* by RT-PCR assays. Only binding site R1 showed positive results. All experiments above were performed in triplicates, where each group consisted of three samples. The *p*-values by one-way ANOVA a, e, c, g and h, or two-way ANOVA b are indicated. Data represent the mean  $\pm$  SD. Source data are provided as a Source Data file.



**The sequence of Rat insulin2 promoter (704 bp)**

GGATCCCCCAACCACTCCAAGTGGAGGCTGAGAAAGGTTTTGTAGCTGGGTAGAGTAT  
GTACTAAGAGATGGAGACAGCTGGCTCTGAGCTCTGAAGCAAGCACCTCTTATGGAGA  
GTTGCTGACCTTCAGGTGCAAATCTAAGATACTACAGGAGAATACACCATGGGCTTCA  
GCCCAGTTGACTCCCGAGTGGGCTATGGGTTTTGTGGAAGGAGAGATAGAAGAGAAGG  
GACCTTTCTTCTTGAATTCTGCTTTCCTTCTACCTCTGAGGGTGAGCTGGGGTCTCAGC  
TGAGGTGAGGACACAGCTATCAGTGGGAACTGTGAAACAACAGTTCAAGGGACAAAG  
TTACTAGGTCCCCCAACAACCTGCAGCCTCCTGGGGAATGATGTGGAAAAATGCTCAGC  
CAAGGACAAAGAAGGCCTCACCTCTCTGAGACAATGTCCCCTGCTGTGAACTGGTTC  
ATCAGGCCACCCAGGAGCCCCTCTTAAGACTCTAATTACCCTAAGGCTAAGTAGAGGT  
GTTGTTGTCCAATGAGCACTTTCTGCAGACCTAGCACCAGGCAAGTGTGGAAACTG  
CAGCTTCAGCCCCTCTGGCCATCTGCTGATCCACCCTTAATGGGACAAACAGCAAAGT  
CCAGGGGTCAGGGGGGGGGTGTCTTGGACTATAAAGCTAGTGGGGATTCAGTAACCCC  
CAGCCCTAA

**Supplementary Table 1 The sgRNA sequences of miR-802 knockout and knock-in mice**

| sgRNA name              | sgRNA sequence(5'-3') | PAM |
|-------------------------|-----------------------|-----|
| miR-802 knockout-5S4    | TGAGCTTGGCCTCCCGGCC   | TGG |
| miR-802 knockout-3S6    | ACTCGGATAGTATGCACACT  | CGG |
| miR-802 knock-in-H11-S2 | CTGAGCCAACAGTGGTAGTA  | AGG |

**Supplementary Table 2 Primer sequences used genotyping of miR-802 mutant mice**

| name                                                            | primer name                  | sequence                             | Band (bp)                               |
|-----------------------------------------------------------------|------------------------------|--------------------------------------|-----------------------------------------|
| Rip-Cre Genotyping                                              | oIMR1084                     | GCGGTCTGGCAGTAAAAA CTATC             | Cre = ~100                              |
|                                                                 | oIMR1085                     | GTGAAACAGCATTGCTGTCAC TT             |                                         |
|                                                                 | oIMR7338                     | CTA GGC CAC AGA ATT GAA AGA<br>TCT   | Internal Positive<br>Control=324        |
|                                                                 | oIMR7339                     | GTA GGT GGA AAT TCT AGC ATC<br>ATC C |                                         |
| miR-802 <sup>fl/fl</sup><br>Genotyping                          | 100276-miR-802-wt-tF1        | TGCCGAGAATGATTGCTGCA                 | wt=121                                  |
|                                                                 | 100276-miR-802-wt-tR1        | TGTTACCGACATTCCCCTTAGA               | fl=214                                  |
| miR-802 KO<br>allele                                            | Zmk-2F4                      | GCATCGCATTGTCTGAGTAGGTG              | null=1156                               |
|                                                                 | 100276-miR-802-F0-3tR1       | AGTGCAGTTACCCGTCACCA                 |                                         |
| miR-802 <sup>ki/ki</sup><br>Genotyping                          | Rabbit-pA-tF1                | CCTGCTGTCCATTCCCTTATCCATA            | ki/ki=337                               |
|                                                                 | H11-tR3                      | ATATCCCCTTGTTCCTTTCTGC               | ki/wt=337<br>wt/wt=none                 |
|                                                                 | H11-tF3                      | GGGCAGTCTGGTACTTCCAAGCT              | ki/ki=none                              |
|                                                                 | H11-tR3                      | ATATCCCCTTGTTCCTTTCTGC               | ki/wt=285<br>wt/wt=285                  |
| miR-802 KI allele                                               | 6163-CAG-tF1                 | CTAGAGCCTCTGCTAACCATGTTTC            | ki(preCre)=317<br>ki(postCre)=0<br>wt=0 |
|                                                                 | 708328-PGK-tR1               | AAGAGCCTTCAGTAAAGAGCAGG              |                                         |
|                                                                 | 6163-CAG-tF1                 | CTAGAGCCTCTGCTAACCATGTTTC            | ki(preCre)=1949<br>ki(postCre)=321      |
|                                                                 | 708328-miR802-tR1            | AGAGCAGGCATTATCTTGCCAC               |                                         |
| High-risk off-target of<br>miR-802 knockout-<br>5S4             | XM100276-miR-802-5S4-<br>tF1 | TTATTGTGTGACTCCAGGGCTG               | 451                                     |
|                                                                 | XM100276-miR802-5S4-<br>tR1  | GTGTCAAATCCCAGCCTGATG                |                                         |
| High-risk off-target of<br>miR-802 knockout-<br>3S6 region 1    | XM100276-miR-802-3S6-<br>tF1 | CCAAGTATGCCTTGCTTTTCAGC              | 553                                     |
|                                                                 | XM100276-miR-802-3S6-<br>tR1 | CCATGTTGGCCTAGTCAGACTTG              |                                         |
| High-risk off-target of<br>miR-802 knockout-<br>3S6 region 2    | XM100276-miR-802-3S6-<br>tF2 | ACAGCATTTAGCTGAGCACCTG               | 650                                     |
|                                                                 | XM100276-miR-802-3S6-<br>tR2 | TGCTCACTAATGCAGTGACAGC               |                                         |
| High-risk off-target of<br>miR-802 knock-in-<br>H11-S2 region 1 | XM708328-H11-S2-tF1          | GATGGCTCGCAAACATCTTTG                | 639                                     |
|                                                                 | XM708328-H11-S2-tR1          | CTGTGGCTTTGTAAAGTTGTCTG<br>G         |                                         |
| High-risk off-target of<br>miR-802 knock-in-<br>H11-S2 region 2 | XM708328-H11-S2-tF2          | CTGGAGTGATTATGAGATGCCTG              | 652                                     |
|                                                                 | XM708328-H11-S2-tR2          | CTGACCTCCATCCTTTAGCAAC               |                                         |
| High-risk off-target of<br>miR-802 knock-in-                    | XM708328-H11-S2-tF3          | GATTCCATTTCTAGCTCTGCCAG              | 725 bp                                  |
|                                                                 | XM708328-H11-S2-tR3          | GAACTGCTTTGCCTGCACTTAAC              |                                         |

|                 |  |  |  |
|-----------------|--|--|--|
| H11-S2 region 3 |  |  |  |
|-----------------|--|--|--|

**Supplementary Table 3 Clinical characteristics of the patients with obese patients and lean individuals**

|                      | Obesity    | Lean       | Total      |
|----------------------|------------|------------|------------|
| Number (male/female) | 75 (44/31) | 22(8/14)   | 97(52/45)  |
| Age (years)          | 52.34±9.41 | 54.68±8.69 | 52.87±9.99 |
| HbA1c (%)            | 7.73±2.14  | 5.67±0.47  | 7.28±2.08  |
| TG (mmol/L)          | 1.55±1.11  | 0.91±0.43  | 1.41±1.04  |
| HDL-C (mmol/L)       | 0.98±0.35  | 1.14±0.19  | 1.02±0.33  |
| LDL-C (mmol/L)       | 2.46±0.92  | 2.29±0.50  | 2.42±0.85  |
| BMI                  | 30.73±2.7  | 22.07±1.87 | 28.53±4.87 |

**Supplementary Table 4 List of miRNAs upregulated (top) and downregulated (bottom) in HFD-fed mice (p<0.05)**

Microarray analysis was performed in quadruplicate and mean  $\pm$  standard error is indicated. The *p*-values by two-tailed unpaired Student's *t* test

| miRNA                    | Log <sub>2</sub> (X-fold (HFD/NCD)) | <i>p</i> -value |
|--------------------------|-------------------------------------|-----------------|
| <i>mmu-miR-1945</i>      | 3.242035183                         | 1.66E-07        |
| <i>mmu-miR-212-3p</i>    | 2.556646996                         | 3.84E-23        |
| <i>mmu-miR-3070-2-3p</i> | 2.361083788                         | 0.000141        |
| <i>mmu-miR-1983</i>      | 2.311880436                         | 5.65E-12        |
| <i>mmu-miR-212-5p</i>    | 2.183221843                         | 3.13E-16        |
| <i>mmu-let-7j</i>        | 2.146049745                         | 0.001357        |
| <i>mmu-miR-802-5p</i>    | 2.02295942                          | 2.31E-14        |
| <i>mmu-miR-3473d</i>     | 1.799682485                         | 0.000823        |
| <i>mmu-miR-708-3p</i>    | 1.401474069                         | 1.35E-07        |
| <i>mmu-miR-493-3p</i>    | 1.375974279                         | 0.001105        |
| <i>mmu-miR-1a-3p</i>     | 1.368004354                         | 1.64E-06        |
| <i>mmu-miR-133b-3p</i>   | 1.267212042                         | 0.001017        |
| <i>mmu-miR-679-5p</i>    | 1.255650988                         | 1.48E-05        |
| <i>mmu-miR-144-3p</i>    | 1.242031741                         | 2.24E-06        |
| <i>mmu-miR-15b-3p</i>    | 1.226077034                         | 3.78E-05        |
| <i>mmu-miR-455-5p</i>    | 1.172391009                         | 5.64E-06        |
| <i>mmu-miR-708-5p</i>    | 1.069166201                         | 1.56E-05        |
| <i>mmu-miR-666-5p</i>    | 1.008341378                         | 0.000129        |
| <i>mmu-miR-672-5p</i>    | -1.006771527                        | 0.001072        |
| <i>mmu-miR-5121</i>      | -1.043046822                        | 0.001178        |
| <i>mmu-miR-150-5p</i>    | -1.297323405                        | 2.44E-07        |
| <i>mmu-miR-142a-3p</i>   | -1.300325043                        | 4.68E-08        |
| <i>mmu-miR-184-3p</i>    | -1.385620116                        | 2.00E-08        |
| <i>mmu-miR-133-5p</i>    | -1.3931178                          | 6.76E-11        |
| <i>mmu-miR-592-5p</i>    | -1.469661042                        | 3.30E-05        |
| <i>mmu-miR-203-5p</i>    | -1.757017156                        | 0.000737        |
| <i>mmu-miR-216b-3p</i>   | -2.115056759                        | 3.70E-13        |
| <i>mmu-miR-216a-3p</i>   | -2.258472925                        | 1.98E-09        |
| <i>mmu-miR-6969-5p</i>   | -2.269401306                        | 8.13E-06        |
| <i>mmu-miR-216b-5p</i>   | -2.333897502                        | 2.29E-20        |
| <i>mmu-miR-217-3p</i>    | -2.553989506                        | 2.98E-15        |
| <i>mmu-miR-216a-5p</i>   | -2.679137841                        | 8.02E-29        |
| <i>mmu-miR-217-5p</i>    | -2.693352297                        | 9.63E-26        |
| <i>mmu-miR-1934-5p</i>   | -2.701028109                        | 6.46E-05        |
| <i>mmu-miR-6969-3p</i>   | -2.819368527                        | 7.07E-11        |
| <i>mmu-miR-196b-5p</i>   | -3.607161183                        | 3.92E-06        |
| <i>mmu-miR-122-3p</i>    | -4.452340005                        | 8.10E-28        |
| <i>mmu-miR-122-5p</i>    | -4.734692003                        | 1.81E-61        |

**Supplementary Table 5 List of miRNAs upregulated (top) and downregulated (bottom) in *Lepr<sup>db/db</sup>* mice (p<0.005)**

Microarray analysis was performed in quadruplicate and mean  $\pm$  standard error is indicated. The *p*-values by two-tailed

unpaired Student's t test

| miR_name                 | X-fold ( <i>Lepr<sup>db/db</sup>/con.</i> ) | <i>p</i> -value |
|--------------------------|---------------------------------------------|-----------------|
| <i>mmu-miR-7622-3p</i>   | 12.92840955                                 | 0.000104        |
| <i>mmu-miR-6538</i>      | 11.94005362                                 | 0.004345        |
| <i>mmu-miR-802-5p</i>    | 4.739058274                                 | 0.000211        |
| <i>mmu-miR-147-5p</i>    | 4.146424818                                 | 0.003876        |
| <i>mmu-miR-6546-5p</i>   | 3.753234851                                 | 5.73E-06        |
| <i>mmu-miR-709</i>       | 3.172334817                                 | 0.001207        |
| <i>mmu-miR-196a-5p</i>   | 3.079092249                                 | 1.63E-07        |
| <i>mmu-miR-155-3p</i>    | 3.020048439                                 | 0.002683        |
| <i>mmu-miR-466i-5p</i>   | 2.940448685                                 | 7.63E-07        |
| <i>mmu-miR-1945</i>      | 2.84521787                                  | 0.000178        |
| <i>mmu-miR-212-3p</i>    | 2.836469225                                 | 1.22E-14        |
| <i>mmu-miR-212-5p</i>    | 2.562166853                                 | 1.79E-12        |
| <i>mmu-miR-196b-5p</i>   | 2.55155411                                  | 9.82E-08        |
| <i>mmu-miR-712-5p</i>    | 2.542128077                                 | 0.000148        |
| <i>mmu-miR-3470b</i>     | 2.49695525                                  | 4.21E-05        |
| <i>mmu-miR-147-3p</i>    | 2.495521522                                 | 6.02E-06        |
| <i>mmu-miR-3070-3p</i>   | 2.48020014                                  | 0.00022         |
| <i>mmu-miR-155-5p</i>    | 2.447619293                                 | 3.35E-11        |
| <i>mmu-miR-3070-2-3p</i> | 2.404508992                                 | 0.000396        |
| <i>mmu-miR-21a-3p</i>    | 2.39899492                                  | 4.07E-10        |
| <i>mmu-miR-223-5p</i>    | 2.329883871                                 | 0.002766        |
| <i>mmu-miR-150-5p</i>    | 2.329498447                                 | 1.64E-10        |
| <i>mmu-miR-142a-3p</i>   | 2.210419227                                 | 1.80E-09        |
| <i>mmu-miR-150-3p</i>    | 2.210050735                                 | 3.91E-05        |
| <i>mmu-miR-1983</i>      | 2.154430526                                 | 2.11E-07        |
| <i>mmu-miR-132-3p</i>    | 2.034436499                                 | 1.96E-08        |
| <i>mmu-miR-6240</i>      | 1.919699857                                 | 0.003968        |
| <i>mmu-miR-211-5p</i>    | 1.909981728                                 | 0.000129        |
| <i>mmu-miR-215-5p</i>    | 1.892510714                                 | 2.55E-05        |
| <i>mmu-miR-142a-5p</i>   | 1.832136907                                 | 4.88E-07        |
| <i>mmu-miR-501-5p</i>    | 1.763617281                                 | 5.13E-06        |
| <i>mmu-miR-214-5p</i>    | 1.728146138                                 | 5.03E-06        |
| <i>mmu-miR-1247-5p</i>   | 1.725033273                                 | 0.000145        |
| <i>mmu-miR-190b-5p</i>   | 1.663537357                                 | 5.17E-05        |
| <i>mmu-miR-494-5p</i>    | 1.62364173                                  | 0.003636        |
| <i>mmu-miR-708-5p</i>    | 1.591629885                                 | 6.65E-06        |
| <i>mmu-miR-199b-5p</i>   | 1.453012534                                 | 3.02E-05        |
| <i>mmu-miR-223-3p</i>    | 1.443709818                                 | 4.67E-05        |

|                        |              |          |
|------------------------|--------------|----------|
| <i>mmu-miR-503-3p</i>  | 1.430467307  | 0.000895 |
| <i>mmu-miR-15b-3p</i>  | 1.395624945  | 0.000197 |
| <i>mmu-miR-708-3p</i>  | 1.378245396  | 9.09E-05 |
| <i>mmu-miR-20b-5p</i>  | 1.373926743  | 0.000299 |
| <i>mmu-miR-145a-5p</i> | 1.373026407  | 0.000176 |
| <i>mmu-miR-199b-3p</i> | 1.369104842  | 0.000127 |
| <i>mmu-miR-199a-3p</i> | 1.368803458  | 0.000128 |
| <i>mmu-miR-3068-5p</i> | 1.350563922  | 0.000156 |
| <i>mmu-miR-455-3p</i>  | 1.348598308  | 0.000197 |
| <i>mmu-miR-574-5p</i>  | 1.338497327  | 0.000152 |
| <i>mmu-miR-450b-5p</i> | 1.312816779  | 0.002884 |
| <i>mmu-miR-451a</i>    | 1.298044582  | 0.000699 |
| <i>mmu-miR-144-3p</i>  | 1.292363281  | 0.000333 |
| <i>mmu-miR-214-3p</i>  | 1.258818011  | 0.000358 |
| <i>mmu-miR-455-5p</i>  | 1.24031328   | 0.00039  |
| <i>mmu-miR-22-3p</i>   | 1.202332445  | 0.00109  |
| <i>mmu-miR-351-5p</i>  | 1.199418314  | 0.000997 |
| <i>mmu-miR-199a-5p</i> | 1.194652843  | 0.000764 |
| <i>mmu-miR-139-5p</i>  | 1.180552291  | 0.000677 |
| <i>mmu-miR-183-5p</i>  | 1.155478377  | 0.000981 |
| <i>mmu-miR-133a-3p</i> | 1.148945779  | 0.001382 |
| <i>mmu-miR-99a-3p</i>  | 1.147943073  | 0.004375 |
| <i>mmu-miR-671-5p</i>  | 1.147755119  | 0.001142 |
| <i>mmu-miR-106a-5p</i> | 1.145428438  | 0.004257 |
| <i>mmu-miR-679-5p</i>  | 1.130355708  | 0.00269  |
| <i>mmu-miR-143-3p</i>  | 1.122403571  | 0.002155 |
| <i>mmu-miR-511-3p</i>  | 1.096036208  | 0.003361 |
| <i>mmu-miR-322-5p</i>  | 1.088724312  | 0.001824 |
| <i>mmu-miR-1a-3p</i>   | 1.088618734  | 0.002065 |
| <i>mmu-miR-146a-5p</i> | 1.04898809   | 0.002652 |
| <i>mmu-miR-145a-3p</i> | 1.037717036  | 0.002884 |
| <i>mmu-miR-187-3p</i>  | -1.009591737 | 0.004028 |
| <i>mmu-miR-374b-5p</i> | -1.016060002 | 0.004368 |
| <i>mmu-miR-872-3p</i>  | -1.022333925 | 0.003467 |
| <i>mmu-miR-153-3p</i>  | -1.062884819 | 0.003965 |
| <i>mmu-miR-411-5p</i>  | -1.095410417 | 0.002228 |
| <i>mmu-miR-3547-3p</i> | -1.109112495 | 0.002976 |
| <i>mmu-miR-338-3p</i>  | -1.148638366 | 0.001267 |
| <i>mmu-miR-23b-3p</i>  | -1.159663732 | 0.001411 |
| <i>mmu-miR-210-3p</i>  | -1.16046995  | 0.001143 |
| <i>mmu-miR-26a-5p</i>  | -1.162788536 | 0.002722 |
| <i>mmu-miR-101a-3p</i> | -1.188789747 | 0.001206 |



|                        |              |          |
|------------------------|--------------|----------|
| <i>mmu-miR-341-3p</i>  | -1.199881681 | 0.000643 |
| <i>mmu-miR-31-5p</i>   | -1.204148408 | 0.000733 |
| <i>mmu-miR-384-5p</i>  | -1.210468608 | 0.000696 |
| <i>mmu-miR-33-3p</i>   | -1.232309772 | 0.002638 |
| <i>mmu-miR-652-5p</i>  | -1.235103796 | 0.003844 |
| <i>mmu-let-7e-5p</i>   | -1.245524128 | 0.000702 |
| <i>mmu-miR-384-3p</i>  | -1.293310747 | 0.000282 |
| <i>mmu-miR-153-5p</i>  | -1.31684577  | 0.000535 |
| <i>mmu-miR-700-3p</i>  | -1.35306301  | 0.000158 |
| <i>mmu-miR-204-5p</i>  | -1.368403349 | 0.000141 |
| <i>mmu-miR-124-3p</i>  | -1.426298494 | 0.00011  |
| <i>mmu-miR-325-3p</i>  | -1.429846754 | 4.98E-05 |
| <i>mmu-miR-217-5p</i>  | -1.434265352 | 5.73E-05 |
| <i>mmu-miR-216a-3p</i> | -1.441308542 | 0.001185 |
| <i>mmu-miR-544-5p</i>  | -1.461554381 | 0.000662 |
| <i>mmu-miR-137-3p</i>  | -1.465802511 | 3.82E-05 |
| <i>mmu-miR-203-3p</i>  | -1.596590931 | 7.40E-06 |
| <i>mmu-miR-217-3p</i>  | -1.617809707 | 2.61E-05 |
| <i>mmu-miR-216a-5p</i> | -1.756193658 | 1.37E-06 |
| <i>mmu-miR-383-3p</i>  | -1.83575558  | 5.13E-05 |
| <i>mmu-miR-592-5p</i>  | -1.901226007 | 2.16E-05 |
| <i>mmu-miR-7116-3p</i> | -1.921791107 | 0.000432 |
| <i>mmu-miR-187-5p</i>  | -1.92272856  | 0.002908 |
| <i>mmu-miR-31-3p</i>   | -1.990991408 | 8.00E-08 |
| <i>mmu-miR-383-5p</i>  | -2.023849089 | 1.94E-08 |
| <i>mmu-miR-216b-3p</i> | -2.116608137 | 1.72E-08 |
| <i>mmu-miR-216b-5p</i> | -2.128540211 | 5.07E-09 |
| <i>mmu-miR-344i</i>    | -2.772201565 | 0.003301 |
| <i>mmu-miR-6971-3p</i> | -3.244194026 | 0.001657 |
| <i>mmu-miR-5125</i>    | -3.34737383  | 1.77E-05 |
| <i>mmu-miR-122-5p</i>  | -4.181992387 | 6.60E-26 |
| <i>mmu-miR-184-3p</i>  | -4.613196989 | 6.27E-30 |
| <i>mmu-miR-122-3p</i>  | -5.201003989 | 3.19E-23 |
| <i>mmu-miR-7092-3p</i> | -12.22941215 | 0.000868 |
| <i>mmu-miR-6897-5p</i> | -12.59557723 | 0.000154 |
| <i>mmu-miR-3080-5p</i> | -12.62911828 | 0.000153 |
| <i>mmu-miR-1934-5p</i> | -13.95123036 | 1.43E-08 |

**Supplementary Table 6 Primer sequences used for RT-PCR**

| Gene                | Forward strand (5'-3')                                          | Reverse strand (5'-3')                                              |
|---------------------|-----------------------------------------------------------------|---------------------------------------------------------------------|
| over-Fzd5           | CGGGATCCCGATGGCTCGACCCGACCCGTCT                                 | GCTCTAGAGCCTATACGTGCGACAGGGAC<br>ACTTGC                             |
| over-CREB           | CGGGATCCCGATGACCATGGAATCTGGAGCA<br>G                            | CCCTCGAGGGTTAATCTGATTTGTGGCAG<br>TAAAGG                             |
| over- Camk II       | CGGGATCCCGATGGCTACCATCACCTGCACC<br>C                            | CCCTCGAGGGTCAATGCGGCAGGACGGA<br>G                                   |
| over-NeuroD1        | CGGAATCCGGCCACCATGACCAAATCATA<br>AGCGAGAG                       | CGGGATCCCCTAATCGTGAAAGATGGCAT<br>TAAG                               |
| over-Foxo1          | CGGGATCCCCGGCCACCATGGCCGAAGCGC<br>CCCAGGTGGTG                   | CCCTCGAGTTAGCCTGACACCCAGCTGTG<br>TG                                 |
| over-Sox6           | CCAAGCTTGGGCCACCATGTCTTCCAAGCAA<br>GCCACCTCTC                   | CCCTCGAGTCAGTTGGCACTGACAGGCTC<br>TGGG                               |
| Fzd5-WT             | TCGAGACGGGTTGGTGCAGGTGAATTTATTA<br>CTGAGCCAAATGAGGCACATACCGAGTT | CTAGAACTCGGTATGTGCCTCATTTGGCT<br>CAGTAATAAATTCACCTGCACCAACCCGT<br>C |
| Fzd5-mut            | TCGAGACGGGTTGGTGCAGGTGAATTTACCG<br>TCAGGCCAAATGAGGCACATACCGAGTT | CTAGAACTCGGTATGTGCCTCATTTGGCC<br>TGACGGTAAATTCACCTGCACCAACCCGT<br>C |
| NeuroD1-WT          | TCGAGCAAGTGATATATGTATTTATTGTCGT<br>TACTGCCTTTGGAAGAAACAGGGGATT  | CTAGAGATCCCCTGTTTCTTCCAAAGGCA<br>GTAACGACAATAAATACATATATCACTT C     |
| NeuroD1-mut         | TCGAGCAAGTGATATATGTATTTATTGTCAC<br>CGTCACCTTTGGAAGAAACAGGGGATT  | CTAGAGATCCCCTGTTTCTTCCAAAGGTG<br>ACGGTGACAATAAATACATATATCACTT C     |
| Sox6 R1             | CAAGCCCAAGGTTTCGAGG                                             | GAAGCCATTCTCCATCATGTGTT                                             |
| Sox6 R2             | TGTGCTCACAAAGGGCTCATA                                           | CTAGTCAAGCCATCATGCAATA                                              |
| Foxo1-mut           | ACCTTGTGACCACCTCTGAGTAATATAAGTC<br>CTGCTA                       | ACTCAGAGGTGGTCACAAGGTCCACAAA<br>CCTGCCTAGAGA                        |
| miR-802-chip        | AGGTCTCCAGGGGACAAGGG                                            | TAGCAGGACTTATATTACTCATCTT                                           |
| wt-miR-802-<br>EMSA | GGACCTTTGTCAACAAGATGAGTAA                                       | TTACTCATCTTGTGACAAAGGTCC                                            |
| mut-miR-802<br>EMSA | GGACCTTGTGACCACCTCTGAGTAA                                       | TTACTCAGAGGTGGTCACAAGGTCC                                           |

**Supplementary Table 7A Oligo sequences used for sgRNA and shRNA**

| Gene            | Forward strand (5'-3')                                          | Reverse strand (5'-3')                                         |
|-----------------|-----------------------------------------------------------------|----------------------------------------------------------------|
| miR-802-sgRNA-1 | CACCGCCACATCACACTATCGAGAG                                       | AAACCTCTCGATAGTGTGATGTGGC                                      |
| miR-802-sgRNA-2 | CACCGTCTCGATAGTGTGATGTGGC                                       | AAACGCCACATCACACTATCGAGAC                                      |
| miR-802-sgRNA-3 | CACCGTAGAGAGTGCATCCTCGGAG                                       | AAACCTCCGAGGATGCACTCTCTAC                                      |
| miR-802-sgRNA-4 | CACCGCACAGGAGCGCTCCACTCCG                                       | AAACCGGAGTGGAGCGCTCCTGTGC                                      |
| shCREB          | GATCCGGGCAGTACATTGCCATTATTCAAG<br>AGATAATGGCAATGTACTGCC TTTTTTG | AATTCAAAAAGGGCAGTACATTGCCATTAT<br>CTCTTGAATAATGGCAATGTACTGCCCG |

**Supplementary Table 7B Target sequences used for siRNA**

| siRNA name | 5'-3'                |
|------------|----------------------|
| si-Fzd5    | UCCUCUUAGUCUAUUUCUU  |
| si-Neurod1 | AUGCCUUUACCAUGCACUA  |
| si-sox6    | GUUCUGUCAUCUCAGCAAAA |
| si-Foxo1   | GAAUUCAAUUCGCCACAAU  |

**Supplementary Table 8 Recombinant plasmids used in this paper**

| Name                  | Source     | Application            |
|-----------------------|------------|------------------------|
| PGL3-miR-802 promoter | This paper | Luciferase             |
| PGL3-miR-802 R1       | This paper | Luciferase             |
| PGL3-Ins2 promoter    | This paper | Luciferase             |
| PGL3-Sox6 promoter    | This paper | Luciferase             |
| PGL3-Sox6 R1          | This paper | Luciferase             |
| PGL3-Sox6 R2          | This paper | Luciferase             |
| PGLO-Fzd5-WT          | This paper | Luciferase             |
| PGLO-Fzd5-Mut         | This paper | Luciferase             |
| PGLO-NeuroD1-WT       | This paper | Luciferase             |
| PGLO-NeuroD1-Mut      | This paper | Luciferase             |
| pcDNA 3.1-NeuroD1     | This paper | Overexpression NeuroD1 |
| pcDNA 3.1-Fzd5        | This paper | Overexpression Fzd5    |
| pcDNA 3.1-CREB        | This paper | Overexpression CREB    |
| pcDNA 3.1-DAD-Foxo1   | This paper | Activation Foxo1       |
| pcDNA 3.1-Sox6        | This paper | Overexpression Sox6    |

**Supplementary Table 9 Quantitative PCR primers sequences**

| Gene            | Forward strand (5'-3')   | Reverse strand (5'-3')  |
|-----------------|--------------------------|-------------------------|
| Mus-miR-802-5p  | CGGCGTCAGTAACAAAGATTC    | TATGGTTTTGACGACTGTGTGAT |
| Pri-mus-miR-802 | TCCCCACCTGACTCTACATAACCT | CGTCCTCTCATCTTCCCTTTCGA |
| Hus-miR-802     | GCCGCGCAGTAACAAAGATT     | TATGGTTGTTACGACTCCTTCAC |
| Foxo1           | CCCAGGCCGGAGTTTAACC      | GTTGCTCATAAAGTCGGTGCT   |
| Fzd5            | CCAAACCTACGCTCCCAGG      | CGCACCTTGTGTAGAGTGG     |
| CREB            | AGCAGCTCATGCAACATCATC    | AGTCCTTACAGGAAGACTGAACT |
| Ins1            | CACTTCCTACCCCTGCTGG      | ACCACAAAGATGCTGTTTGACA  |
| Ins2            | GCTTCTTCTACACACCCATGTC   | AGCACTGATCTACAATGCCAC   |
| NeuroD1         | ATGACCAAATCATAACAGCGAGAG | TCTGCCTCGTGTTCCTCGT     |
| Sox6            | GGTCATGTTTCCCACCCACAA    | TTCAGAGGGGTCCAAATTCCT   |
| Hes1            | CCAGCCAGTGTC AACACGA     | AATGCCGGGAGCTATCTTTCT   |
| Bhlhe22         | TGAACGACGCTCTGGATGAG     | GGTTGAGGTAGGCGACTAAGC   |
| Pdx1            | CCCCAGTTTACAAGCTCGCT     | CTCGGTTCCATTCCGGGAAAGG  |
| MafA            | AGGAGGAGGTCATCCGACTG     | CTTCTCGCTCTCCAGAATGTG   |
| Nkx6.1          | CTGCACAGTATGGCCGAGATG    | CCGGGTATGTGAGCCCAA      |
| Pax6            | TACCAGTGTCTACCAGCCAAT    | TGCACGAGTATGAGGAGGTCT   |
| Nkx2.2          | AAGCATTTCAAACCGACGGA     | CCTCAAATCCACAGATGACCAGA |
| Gapdh           | AGGTCGGTGTGAACGGATTTG    | TGTAGACCATGTAGTTGAGGTCA |

**Supplementary Table 10 The antibodies used in Western blot and immunofluorescence**

| Protein   | Catalog          | Dilution for Western blot | Dilution for IF |
|-----------|------------------|---------------------------|-----------------|
| Foxo1     | Abcam (ab39670)  | 1:1000                    |                 |
| NeuroD1   | CST(4373)        | 1:1000                    |                 |
| Fzd5      | Abcam (ab14475)  | 1:1000                    |                 |
| Camk II   | CST (4436)       | 1:1000                    |                 |
| P-Camk II | CST (12716)      | 1:1000                    |                 |
| CREB      | Abcam (ab31387)  | 1:1000                    |                 |
| P-CREB    | Abcam (ab32096)  | 1:1000                    |                 |
| Sox6      | Abcam (ab64946)  | 1:1000                    |                 |
| Lamin B1  | Abcam (ab133741) | 1:2000                    |                 |
| GAPDH     | Abcam (ab181602) | 1:2000                    |                 |
| Insulin   | R&D (MAB1417)    |                           | 1:500           |
| Glucagon  | Abcam (EP3070)   |                           | 1:250           |

**Supplementary Table 11 A the actual number of miR-802 KI mice (F0 to F1) for each genotype**

| Genotype                         | number | female | male |
|----------------------------------|--------|--------|------|
| Rip-Cre miR-802 <sup>ki/wt</sup> | 28     | 8      | 20   |
| miR-802 <sup>ki/wt</sup>         | 24     | 7      | 17   |
| Total                            | 52     | 15     | 37   |

**Supplementary Table 11 B the actual number of miR-802 KI mice (F1 to F2) for each genotype**

| Genotype                         | number | female | male |
|----------------------------------|--------|--------|------|
| Rip-Cre miR-802 <sup>ki/ki</sup> | 48     | 16     | 32   |
| Rip-Cre miR-802 <sup>ki/wt</sup> | 49     | 16     | 33   |
| miR-802 <sup>ki/ki</sup>         | 46     | 15     | 31   |
| miR-802 <sup>ki/wt</sup>         | 41     | 14     | 27   |
| Total                            | 184    | 61     | 123  |

**Supplementary Table 12 A the actual number of miR-802 KO (F0 to F1) mice for each genotype**

| Genotype                         | number | female | male |
|----------------------------------|--------|--------|------|
| Rip-Cre miR-802 <sup>fl/wt</sup> | 39     | 12     | 27   |
| miR-802 <sup>fl/wt</sup>         | 37     | 10     | 27   |
| Total                            | 76     | 24     | 52   |

**Supplementary Table 12 B the actual number of miR-802 KO (F1 to F2) mice for each genotype**

| Genotype                         | number | female | male |
|----------------------------------|--------|--------|------|
| Rip-Cre miR-802 <sup>fl/fl</sup> | 73     | 21     | 52   |
| Rip-Cre miR-802 <sup>fl/wt</sup> | 74     | 24     | 50   |
| miR-802 <sup>fl/fl</sup>         | 69     | 19     | 50   |
| miR-802 <sup>fl/wt</sup>         | 68     | 21     | 47   |
| Total                            | 284    | 85     | 199  |
